# Supplementary material for: The DNA methylation haplotype (mHap) format and mHapTools
Source: Oxford University Press journal article supplement (doi:10.1093/bioinformatics/btab458), 2021-06-17
Supplement: btab458_supplementary_data.zip [file btab458_supplementary_data.zip]

Archive with 13 entries (13 files):
- Fig. S1.pdf
- Fig. S10.pdf
- Fig. S11.pdf
- Fig. S12.pdf
- Fig. S2.pdf
- Fig. S3.pdf
- Fig. S4.pdf
- Fig. S5.pdf
- Fig. S6.pdf
- Fig. S7.pdf
- Fig. S8.pdf
- Fig. S9.pdf
- Supplementary_Methods_Tables.pdf
