# Supplementary material for: The DNA methylation haplotype (mHap) format and mHapTools
Source: Oxford University Press journal article supplement (doi:10.1093/bioinformatics/btab458), 2021-06-17
Supplement: btab458_supplementary_data.zip [file btab458_supplementary_data.zip › Fig. S1.pdf]

## BSMAP:

|                                       |        |      |           |     |     |   |   |   |                                      |
|---------------------------------------|--------|------|-----------|-----|-----|---|---|---|--------------------------------------|
| SRX759486_run1.32619849               | 0      | chr1 | 149718767 | 255 | 31M | * | 0 | 0 | CGGCGGGAGAAGTCGCGGGAGAGGATTAGG       |
| ==DDDDDF?Fb0?8@;6;5@66>?CBBBB@B       | NM:i:0 | chr1 | 149718767 | 255 | 31M | * | 0 | 0 | TGGTGGGAGAAGTTGTGTGGAGAGGATTAGGTGTTG |
| SRX759486_run2.34554911               | 0      | chr1 | 149718767 | 255 | 36M | * | 0 | 0 | TGGTGGGAGAAGTTGTGTGGAGAGGATTAGGTGTTG |
| :=?4=:::DCDDDE9:<+A;C9ECC9?13?:?DD?   | NM:i:0 | chr1 | 149718767 | 255 | 36M | * | 0 | 0 | TGGTGGGAGAAGTTGTGTGGAGAGGATTAGGTGTTG |
| SRX759486_run1.35560695               | 0      | chr1 | 149718767 | 255 | 36M | * | 0 | 0 | TGGTGGGAGAAGTTGTGTGGAGAGGATTAGGTGTTG |
| ==@+@ADAD?@FDDEFH?GGG>G@FGIIIEFGHBFGH | NM:i:0 | chr1 | 149718767 | 255 | 31M | * | 0 | 0 | CGGCGGGAGAAGTCGCGCGGAGAGGATTAGG      |
| SRX759486_run2.35069929               | 0      | chr1 | 149718767 | 255 | 31M | * | 0 | 0 | CGGCGGGAGAAGTCGCGCGGAGAGGATTAGG      |
| ?=:DDDDDF?DF?9B?F;@5A<?>?C?A>@:B      | NM:i:0 | chr1 | 149718767 | 255 | 36M | * | 0 | 0 | CGGTGGGAGAAGTCGTCGGAGAGGATTAGGTGTTG  |
| SRX759486_run3.34251436               | 0      | chr1 | 149718767 | 255 | 36M | * | 0 | 0 | CGGTGGGAGAAGTCGTCGGAGAGGATTAGGTGTTG  |
| ==?BB1@?BFADACGGGGHGGIGEEHGHCBDFH@    | NM:i:0 | chr1 | 149718767 | 255 | 20M | * | 0 | 0 | CGGCGGGAGAAGTCGCGCGG                 |
| SRX759486_run1.2364419                | 0      | chr1 | 149718767 | 255 | 20M | * | 0 | 0 | CGGCGGGAGAAGTCGCGCGG                 |
| ???DDDDDD::?9?j76@:@A                 | NM:i:0 | chr1 | 149718767 | 255 | 36M | * | 0 | 0 | CGGCGGGAGAAGTTGTGCGGAGAGGATTAGGGGTTG |
| SRX759486_run3.34896416               | 0      | chr1 | 149718767 | 255 | 36M | * | 0 | 0 | CGGCGGGAGAAGTTGTGCGGAGAGGATTAGGGGTTG |
| ==:BDDDDDFH)0?B?FB7:::@CECEHFE;(9=A6  | NM:i:1 | chr1 | 149718767 | 255 | 36M | * | 0 | 0 | TGGTGGGAGAAGTTGTGTGGAGAGGATTAGGTGTTG |
| SRX759486_run3.35980782               | 0      | chr1 | 149718767 | 255 | 36M | * | 0 | 0 | TGGTGGGAGAAGTTGTGTGGAGAGGATTAGGTGTTG |
| ==>AA=?<?<8<+<A7C+A7+++2155=?BAB4?<?B | NM:i:0 | chr1 | 149718767 | 255 | 36M | * | 0 | 0 | TGGTGGGAGAAGTTGTGTGGAGAGGATTAGGTGTTG |

## B

**BISMARCK:**

|                                                |   |                          |                          |    |     |                              |   |   |                                    |         |                |
|------------------------------------------------|---|--------------------------|--------------------------|----|-----|------------------------------|---|---|------------------------------------|---------|----------------|
| SRX759486_run2.34554911.34554911.length=36     | 0 | chr1                     | 149718767                | 38 | 36M | *                            | 0 | 0 | TGGTGGGAGAAAGTTGTGTGGAGAGGATTAGGT- |         |                |
| GTGG ?=4=::DCDDDE9:<+A;+C9ECC9?13?:?DD? NM:i:9 |   | MD:Z:0C2C8C0C1C1C8C0C5C2 |                          |    |     | XM:Z:z.z.z.z.z.z.z.z.hx.x.x. |   |   | XR.Z:CT                            | XG.Z:CT | RG.Z:SRX759486 |
| SRX759486_run2.35069929.35069929.length=36     | 0 | chr1                     | 149718767                | 38 | 36M | *                            | 0 | 0 | CGCGGGGAGAAAGTCGCGGGAGAGGATTAGGT-  |         |                |
| GTGG ?=DDDDDD?DF?9B?F:@5A?>?C7A:@:B#####       |   | MD:Z:12C13C0C5C2         |                          |    |     | XM:Z:Z.Z.Z.Z.Z.Z.Z.hx.x.x.   |   |   | XR.Z:CT                            | XG.Z:CT | RG.Z:SRX759486 |
| SRX759486_run1.2364419.2364419.length=36       | 0 | NM:i:4                   | 149718767                | 38 | 36M | *                            | 0 | 0 | CGCGGGGAGAAAGTCGCGGGAGAGGATTAGGT-  |         |                |
| GTGG ???DDDDDD::?9?j76@A#####                  |   | MD:Z:12C13C0C5C2         |                          |    |     | XM:Z:Z.Z.Z.Z.Z.Z.Z.hx.x.x.   |   |   | XR.Z:CT                            | XG.Z:CT | RG.Z:SRX759486 |
| SRX759486_run1.32619849.32619849.length=36     | 0 | chr1                     | 149718767                | 0  | 36M | *                            | 0 | 0 | CGCGGGGAGAAAGTCGCGGGAGAGGATTAGGG-  |         |                |
| GTGG ?==DDDDDD?FB0?78@6;5@6>?CBBBB@B#####      |   | NM:i:5                   | MD:Z:12C13C0C3T1C2       |    |     | XM:Z:Z.Z.Z.Z.Z.Z.Z.hx.x.x.   |   |   | XR.Z:CT                            | XG.Z:CT | RG.Z:SRX759486 |
| SRX759486_run1.35560695.35560695.length=36     | 0 | chr1                     | 149718767                | 38 | 36M | *                            | 0 | 0 | TGGTGGGAGAAAGTTGTGTGGAGAGGATTAGGT- |         |                |
| GTGG ==@+ADAD?@FDDEFH?GGG>G@FGIIIEFHGBFGH      |   | NM:i:9                   | MD:Z:0C2C8C0C1C1C8C0C5C2 |    |     | XM:Z:z.z.z.z.z.z.z.z.hx.x.x. |   |   | XR.Z:CT                            | XG.Z:CT | RG.Z:SRX759486 |
| SRX759486_run3.34251436.34251436.length=36     | 0 | chr1                     | 149718767                | 38 | 36M | *                            | 0 | 0 | CGGTGGGAGAAAGTCGTGCGGAGAGATTAGGT-  |         |                |
| GTGG ==?BB1@BFADACGGGGHHGGIGEEHGHCBDFH@        |   | NM:i:6                   | MD:Z:3C8C2C10C0C5C2      |    |     | XM:Z:z.z.z.z.z.z.z.z.hx.x.x. |   |   | XR.Z:CT                            | XG.Z:CT | RG.Z:SRX759486 |
| SRX759486_run3.34896416.34896416.length=36     | 0 | chr1                     | 149718767                | 0  | 36M | *                            | 0 | 0 | CGCGGGGAGAAAGTTGTGCGGAGAGGATTAGGG- |         |                |
| GTGG =:BDDDDDFH?)0?B?F7?::@CECEHF:(9=A6NM:i:7  |   | MD:Z:12C0C1C10C0C3T1C2   |                          |    |     | XM:Z:Z.Z.Z.Z.Z.Z.Z.hx.x.x.   |   |   | XR.Z:CT                            | XG.Z:CT | RG.Z:SRX759486 |
| SRX759486_run3.35980782.35980782.length=36     | 0 | chr1                     | 149718767                | 38 | 36M | *                            | 0 | 0 | TGGTGGGAGAAAGTTGTGTGGAGAGGATTAGGT- |         |                |
| GTGG ==AA=?<8<+A7C+A7++2155?>BABA4?<B          |   | NM:i:9                   | MD:Z:0C2C8C0C1C1C8C0C5C2 |    |     | XM:Z:z.z.z.z.z.z.z.z.hx.x.x. |   |   | XR.Z:CT                            | XG.Z:CT | RG.Z:SRX759486 |

## C

mHap  
before aggregation  
(Information reduction)

|      |           |           |       |   |   |
|------|-----------|-----------|-------|---|---|
| chr1 | 149718767 | 149718784 | 00000 | 1 | + |
| chr1 | 149718767 | 149718784 | 00000 | 1 | + |
| chr1 | 149718767 | 149718784 | 00000 | 1 | + |
| chr1 | 149718767 | 149718784 | 10101 | 1 | + |
| chr1 | 149718767 | 149718784 | 11001 | 1 | + |
| chr1 | 149718767 | 149718784 | 11111 | 1 | + |
| chr1 | 149718767 | 149718784 | 11111 | 1 | + |
| chr1 | 149718767 | 149718784 | 11111 | 1 | + |

**XM Tag**  
**h** unmethylated C in CHH context  
**H** methylated C in CHH context  
**x** unmethylated C in CHG context  
**X** methylated C in CHG context  
**z** unmethylated C in CpG context  
**Z** methylated C in CpG context

## D

## mHap

|      |           |           |       |   |   |
|------|-----------|-----------|-------|---|---|
| chr1 | 149718767 | 149718784 | 00000 | 3 | + |
| chr1 | 149718767 | 149718784 | 10101 | 1 | + |
| chr1 | 149718767 | 149718784 | 11001 | 1 | + |
| chr1 | 149718767 | 149718784 | 11111 | 3 | + |
