# Supplementary material for: The DNA methylation haplotype (mHap) format and mHapTools
Source: Oxford University Press journal article supplement (doi:10.1093/bioinformatics/btab458), 2021-06-17
Supplement: btab458_supplementary_data.zip [file btab458_supplementary_data.zip › Fig. S3.pdf]

**A****RRBS**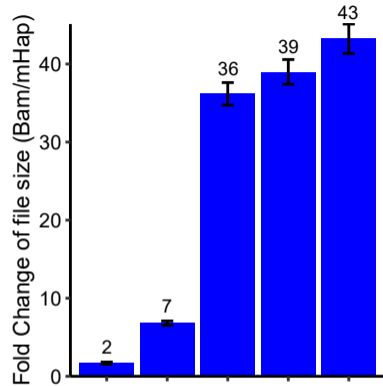

|                       |   |   |   |   |   |
|-----------------------|---|---|---|---|---|
| Information reduction | + | + | + | + | + |
| Aggregation           | - | + | - | + | + |
| Gzip                  | - | - | + | + | + |
| Binary                | - | - | - | - | + |

**B****WGBS**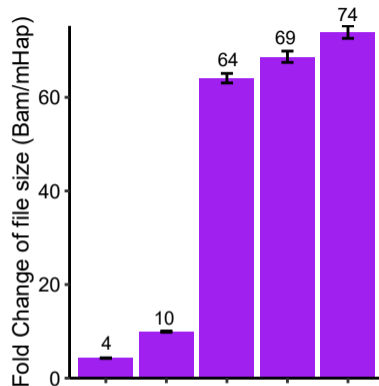

|                       |   |   |   |   |   |
|-----------------------|---|---|---|---|---|
| Information reduction | + | + | + | + | + |
| Aggregation           | - | + | - | + | + |
| Gzip                  | - | - | + | + | + |
| Binary                | - | - | - | - | + |

**C****Targeted-BS**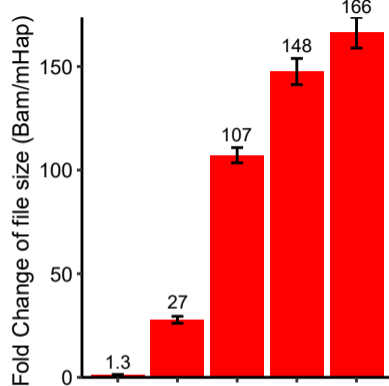

|                       |   |   |   |   |   |
|-----------------------|---|---|---|---|---|
| Information reduction | + | + | + | + | + |
| Aggregation           | - | + | - | + | + |
| Gzip                  | - | - | + | + | + |
| Binary                | - | - | - | - | + |
