# Supplementary figures and images for: The DNA methylation haplotype (mHap) format and mHapTools
Source: Oxford University Press journal article supplement (doi:10.1093/bioinformatics/btab458), 2021-06-17

**A**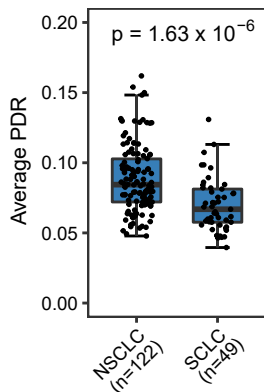**B**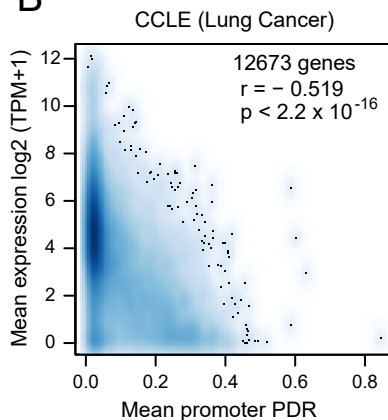**C**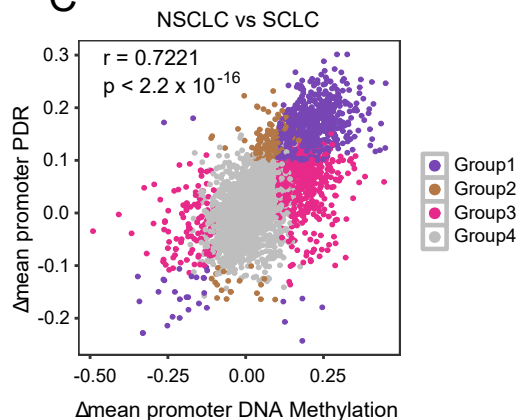**D**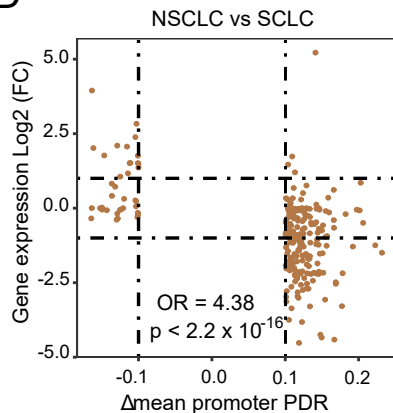**E**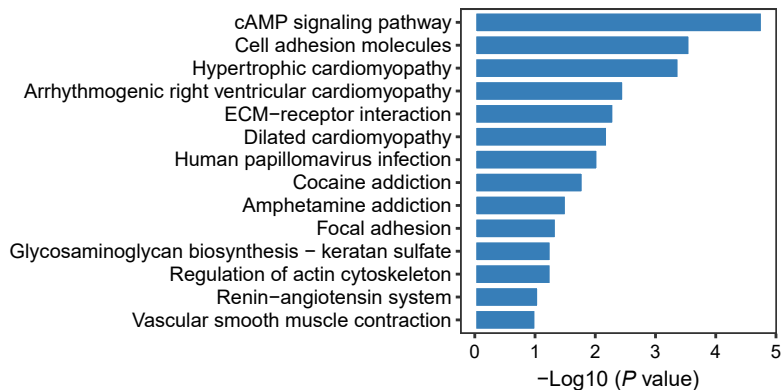

Supplement: btab458_supplementary_data.zip [file btab458_supplementary_data.zip › Fig. S10.pdf]

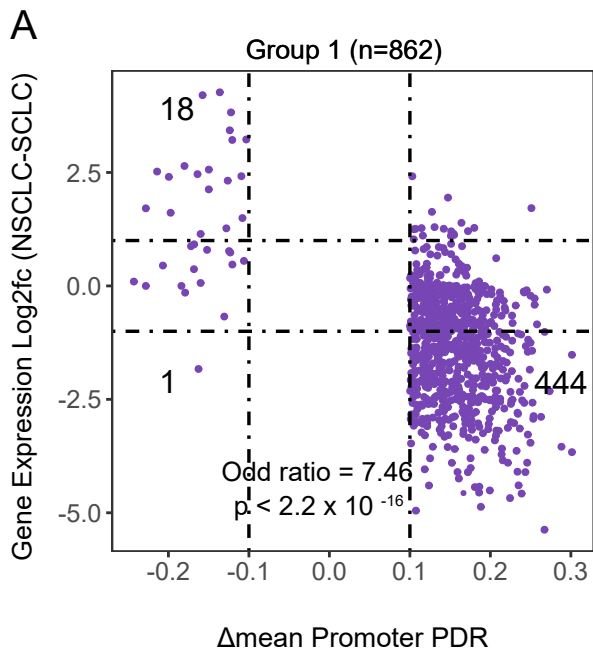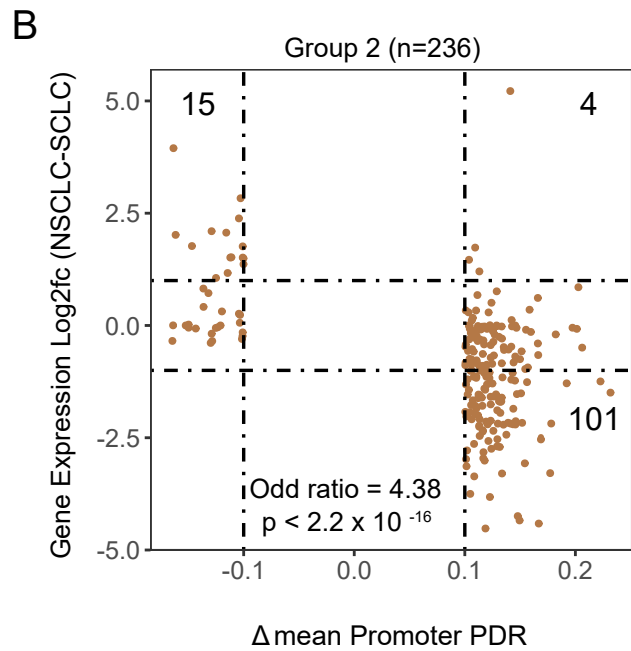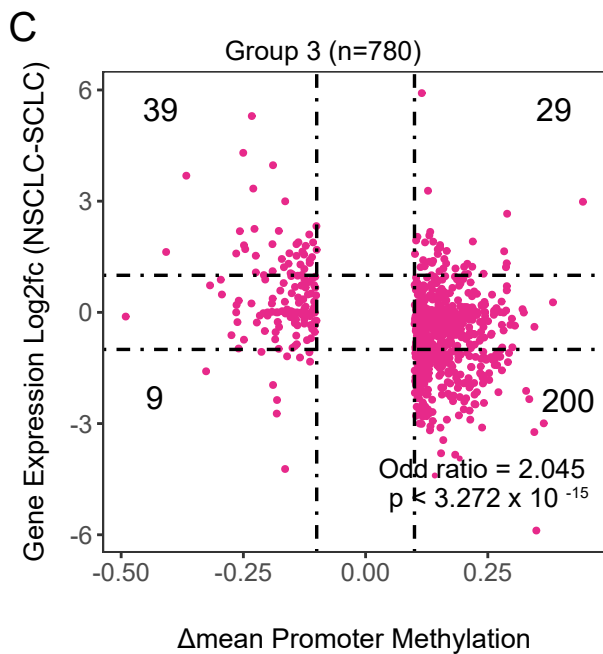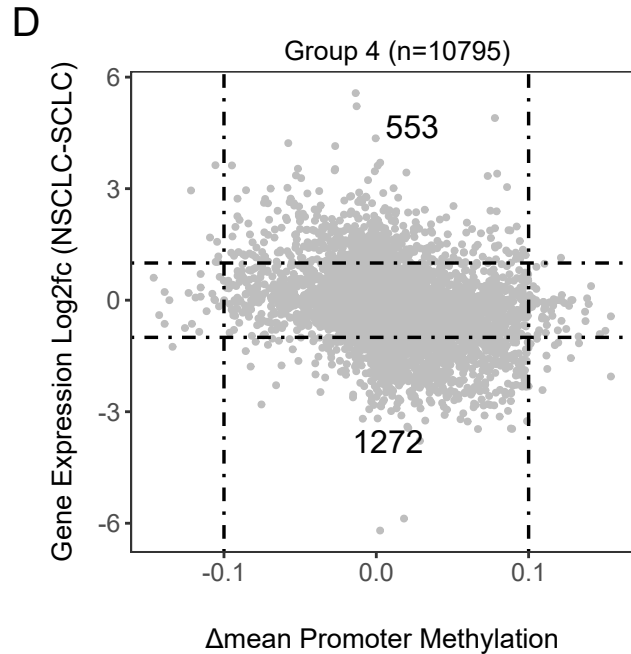

Supplement: btab458_supplementary_data.zip [file btab458_supplementary_data.zip › Fig. S11.pdf]

A

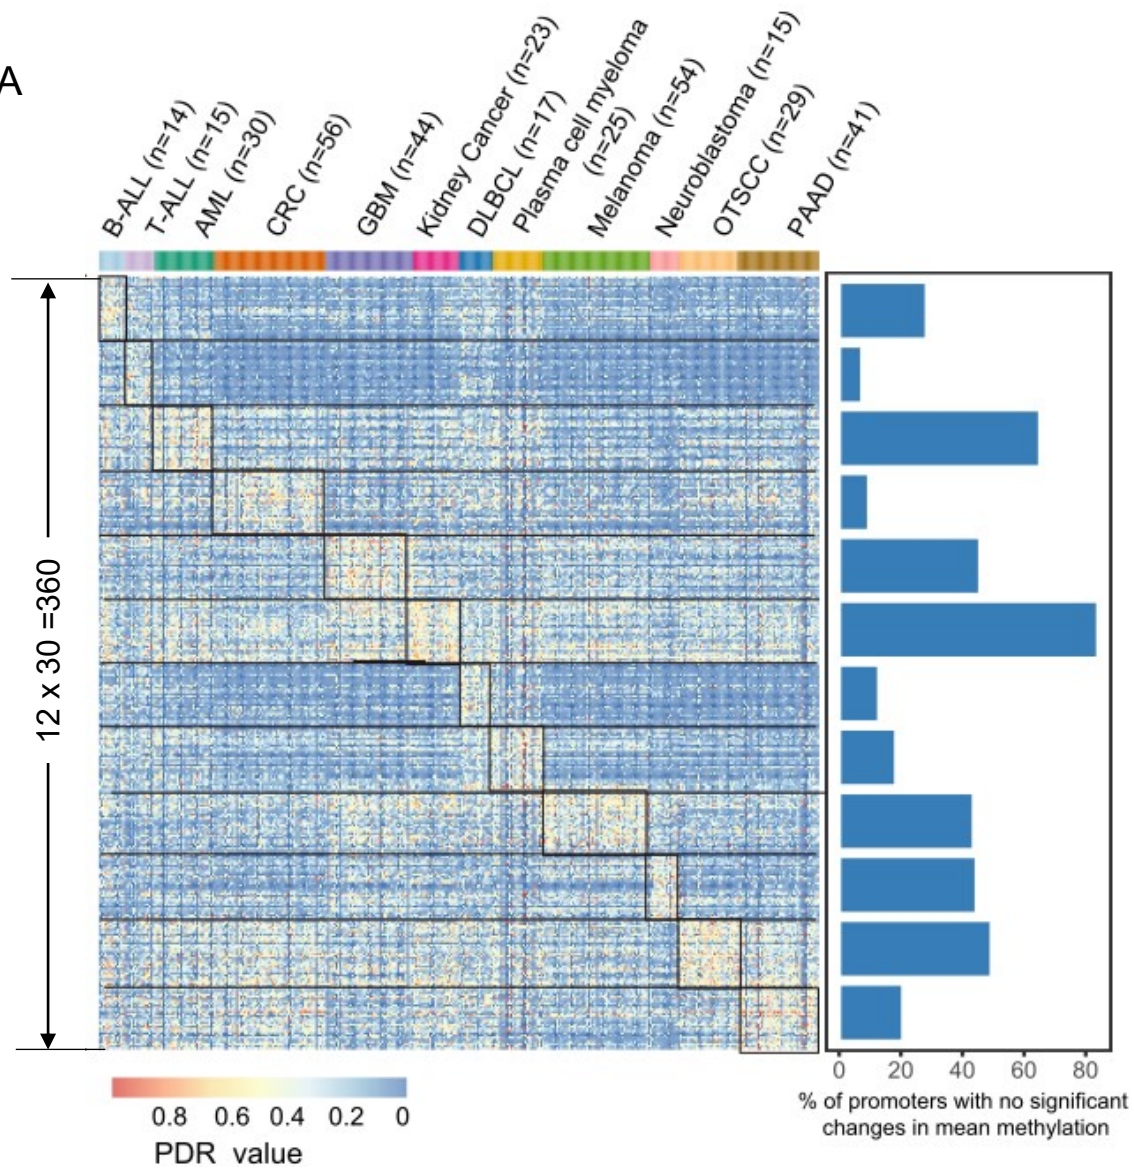

B

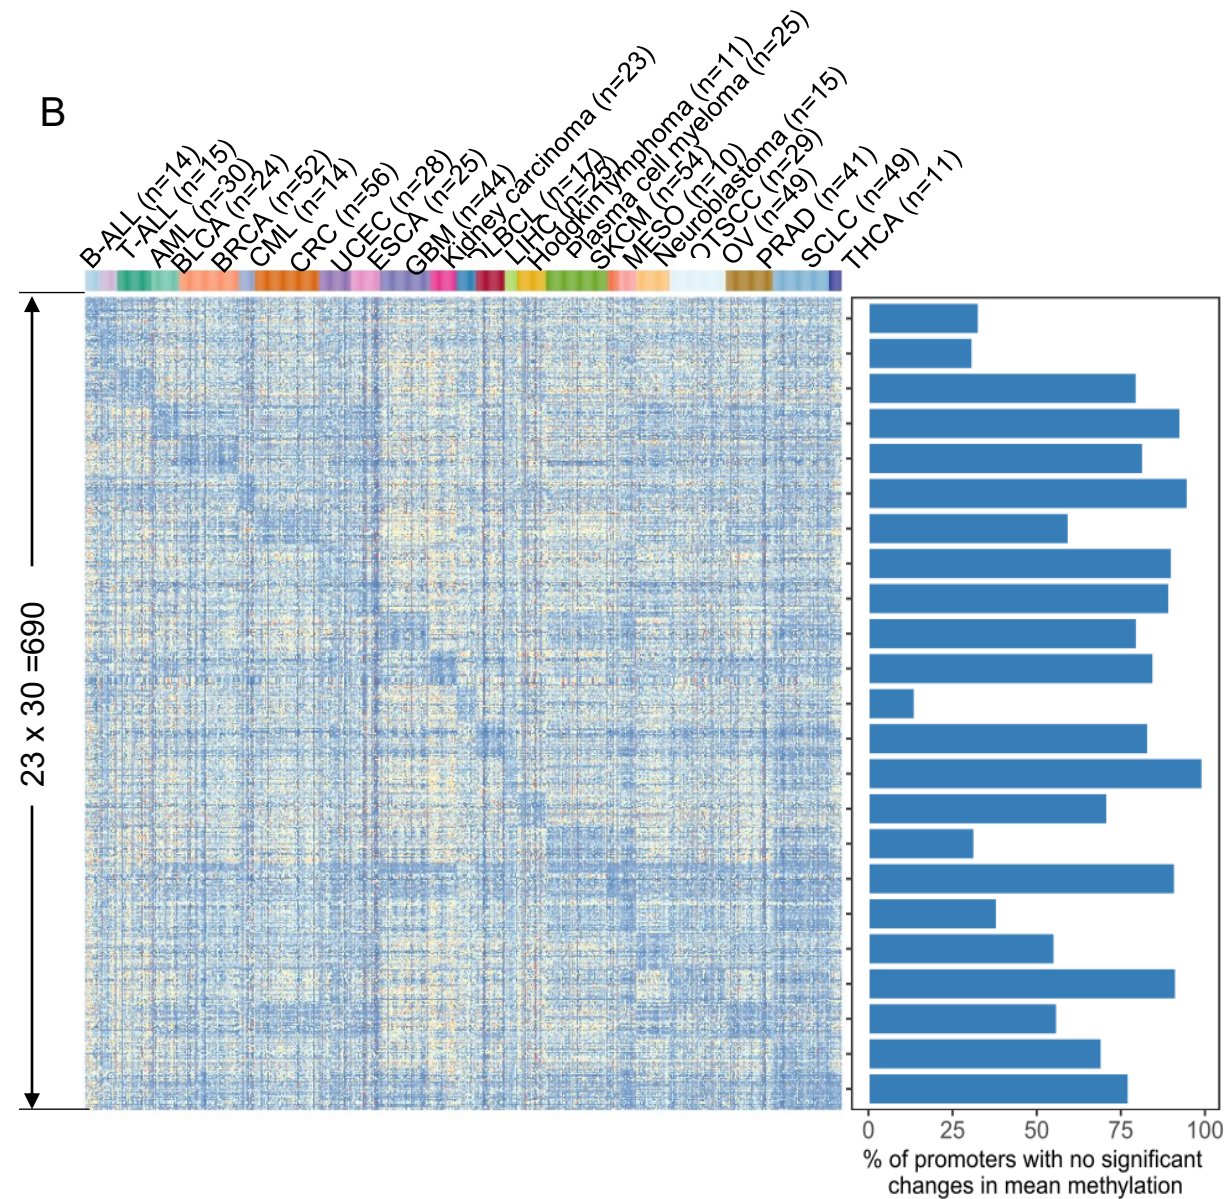

Supplement: btab458_supplementary_data.zip [file btab458_supplementary_data.zip › Fig. S12.pdf]

**A**

RRBS

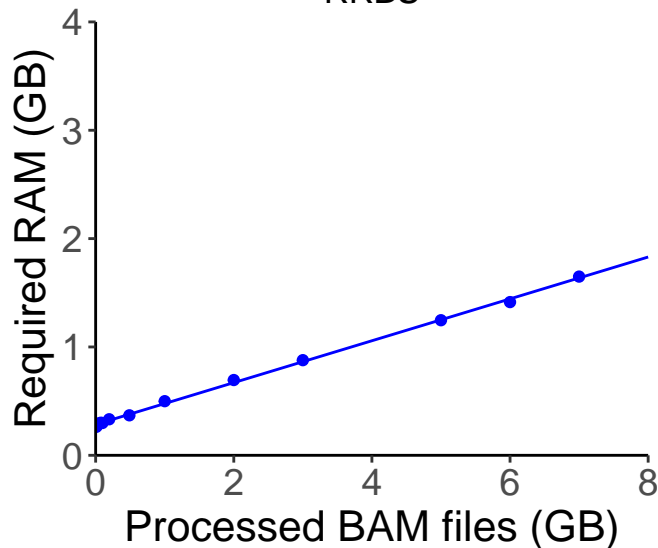**B**

Targeted-BS

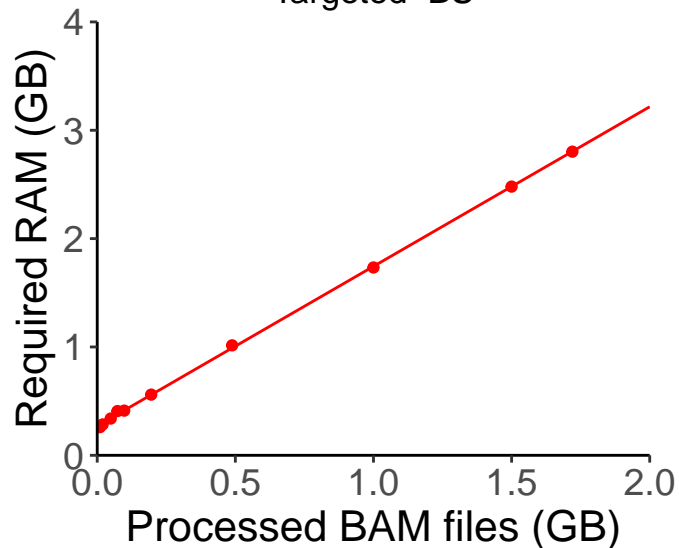**C**

RRBS

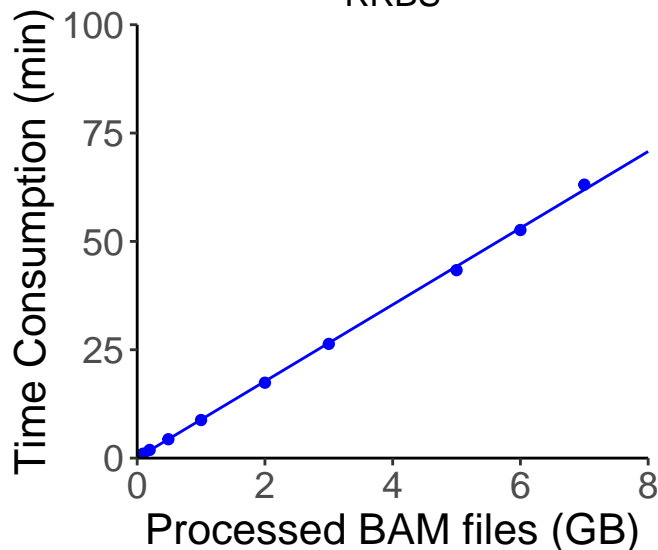**D**

Targeted-BS

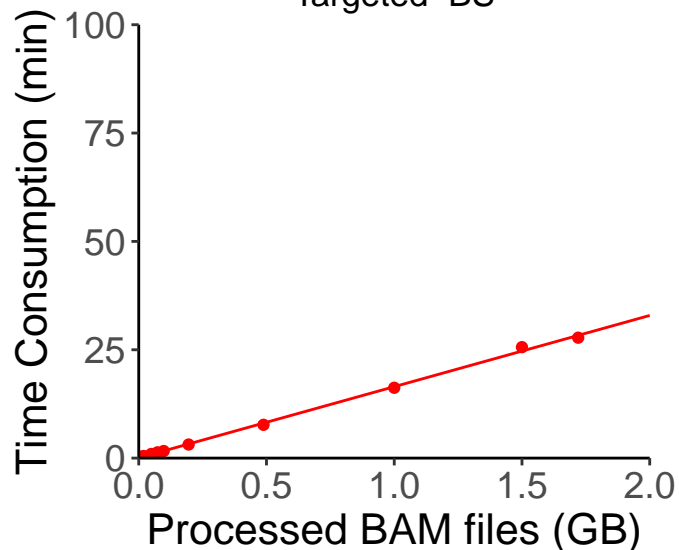

Supplement: btab458_supplementary_data.zip [file btab458_supplementary_data.zip › Fig. S2.pdf]

Fold changes of mHap file size  
(binary + gzip) / gzip compression

0.96  
0.94  
0.93  
0.92  
0.90

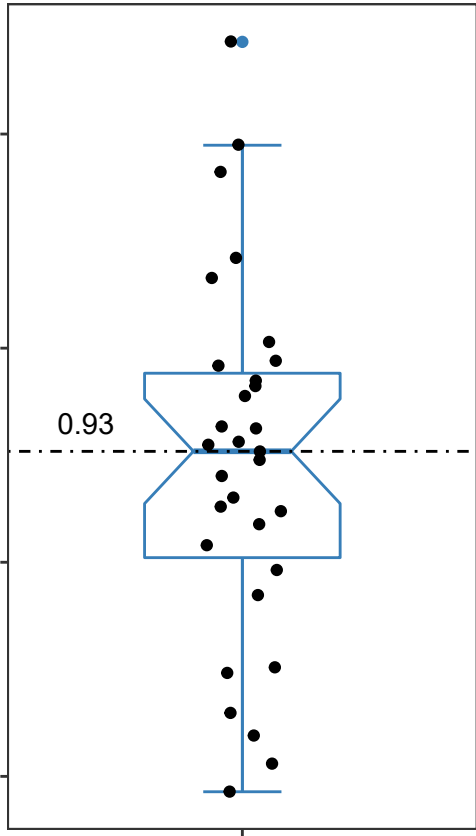

Supplement: btab458_supplementary_data.zip [file btab458_supplementary_data.zip › Fig. S4.pdf]

A

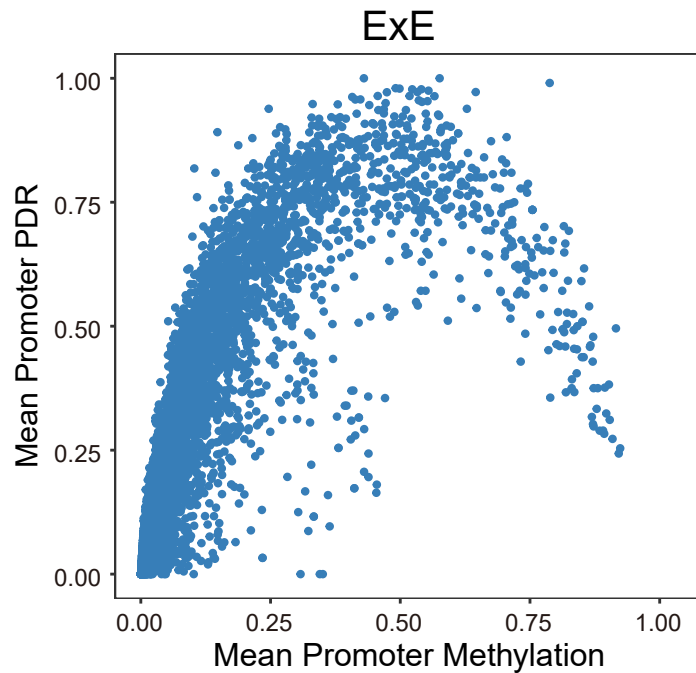

B

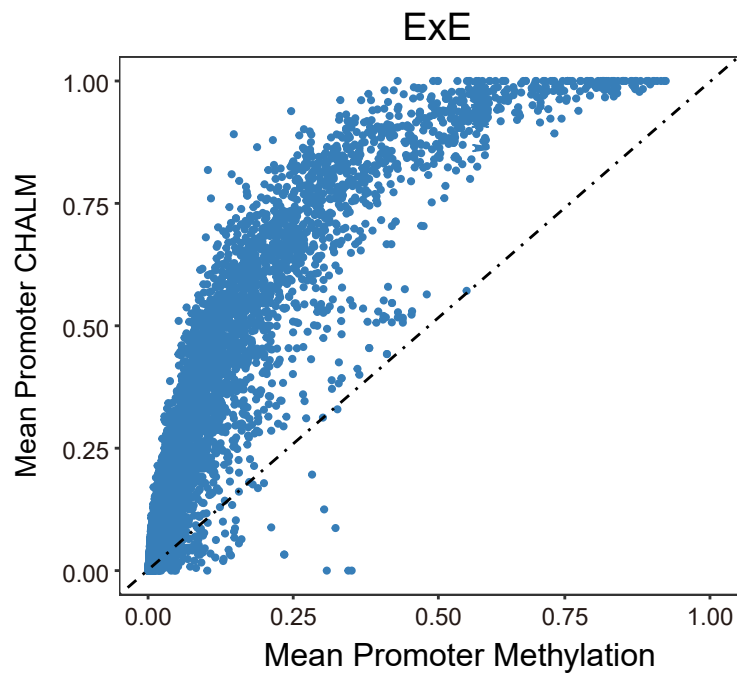

Supplement: btab458_supplementary_data.zip [file btab458_supplementary_data.zip › Fig. S5.pdf]

**ExE**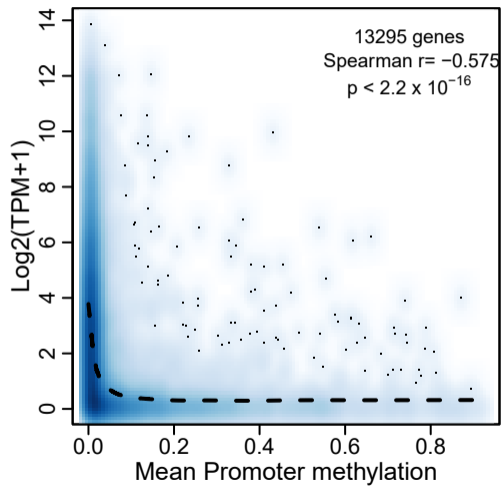**ExE**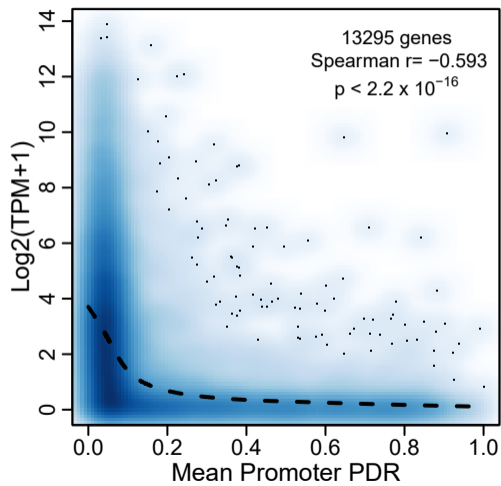**ExE**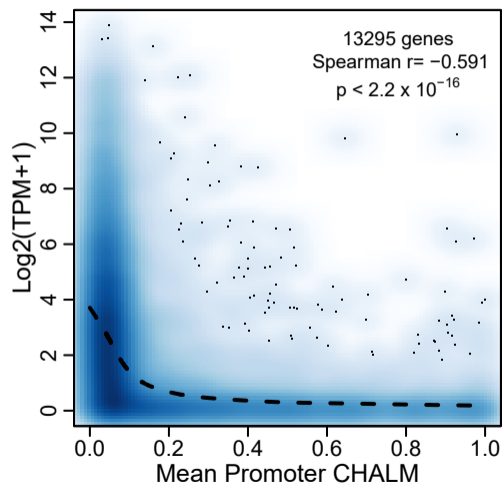

Supplement: btab458_supplementary_data.zip [file btab458_supplementary_data.zip › Fig. S6.pdf]

A

## ExE vs Epiblast

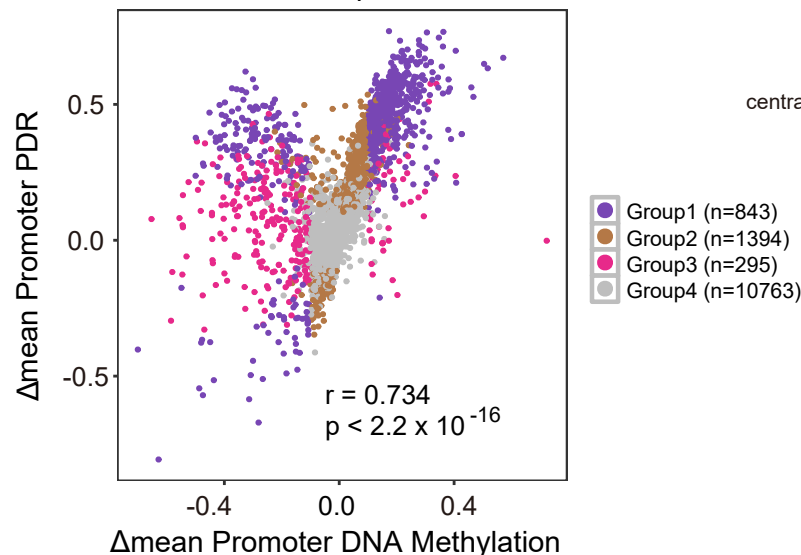

B

## Group 1

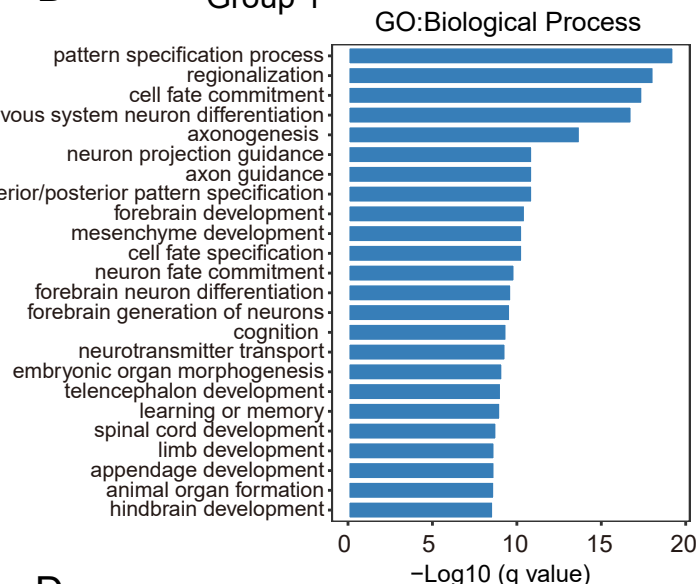

C

## Group 2

## GO:Biological Process

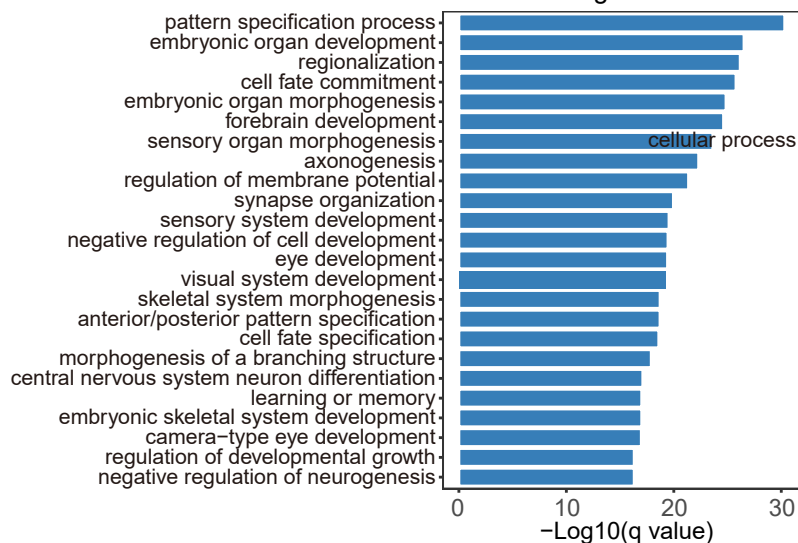

D

## Group 3

## GO:Biological Process

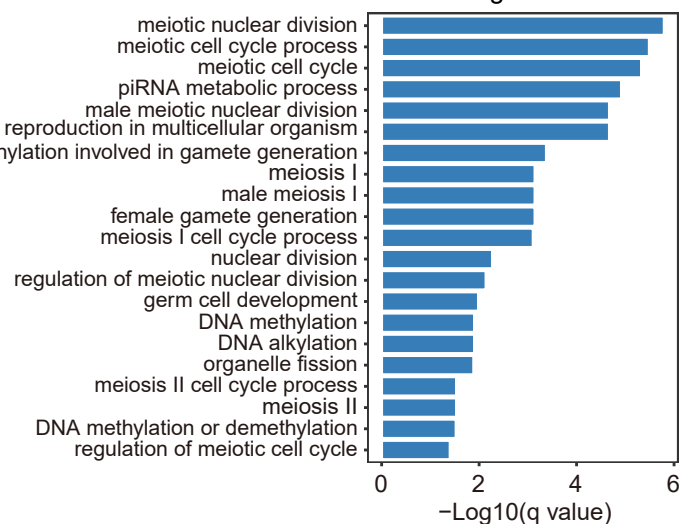

Supplement: btab458_supplementary_data.zip [file btab458_supplementary_data.zip › Fig. S7.pdf]

A

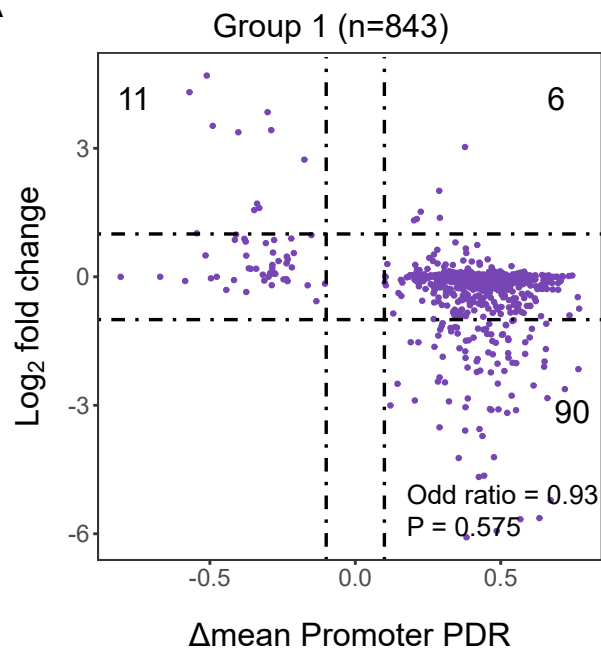

B

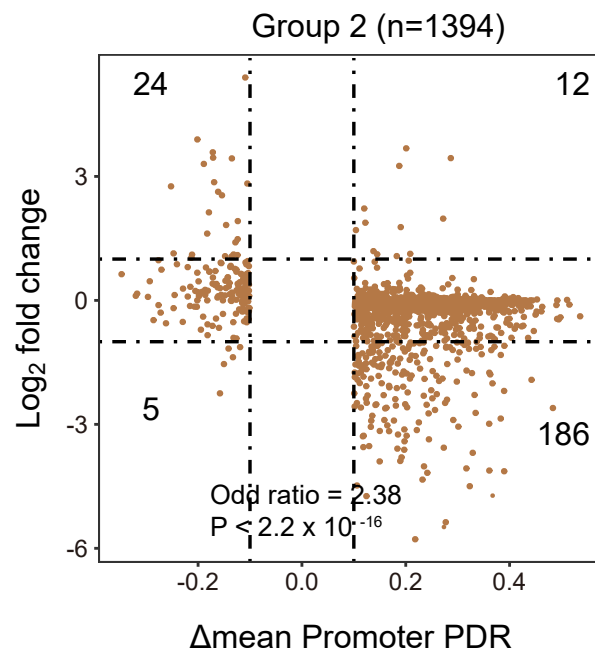

C

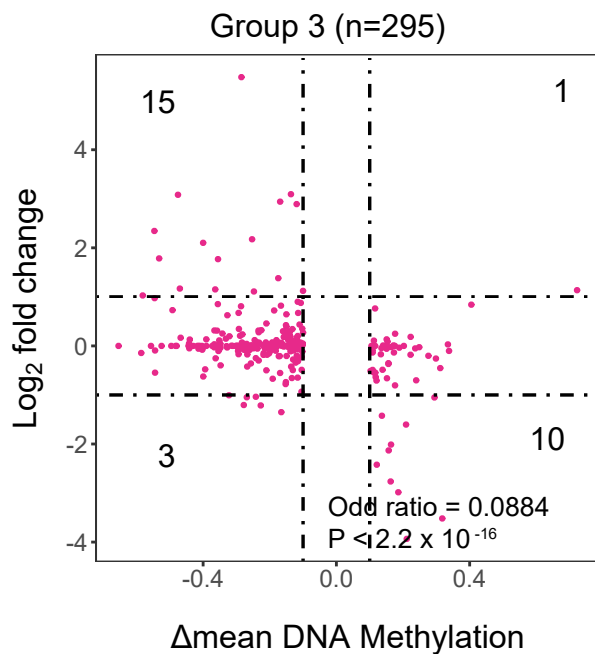

D

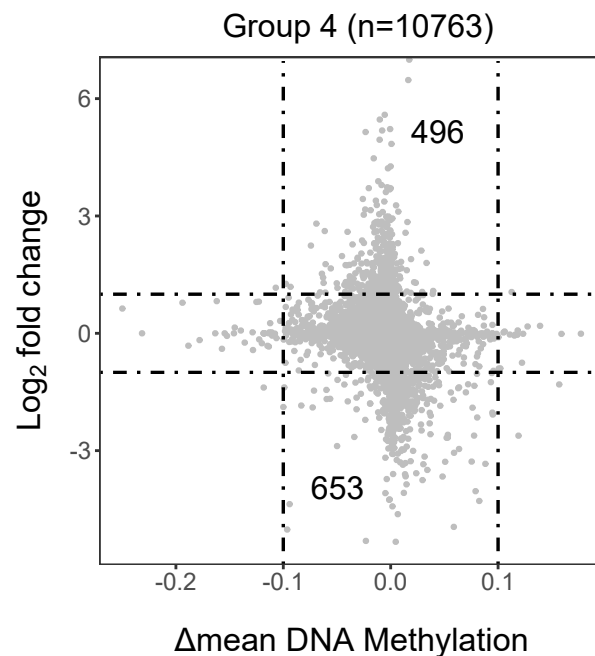

Supplement: btab458_supplementary_data.zip [file btab458_supplementary_data.zip › Fig. S8.pdf]

**A**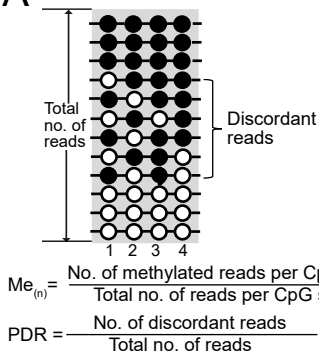**B**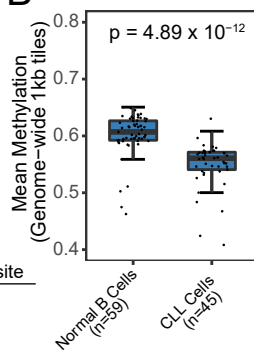**C**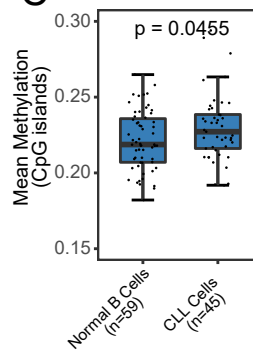**D**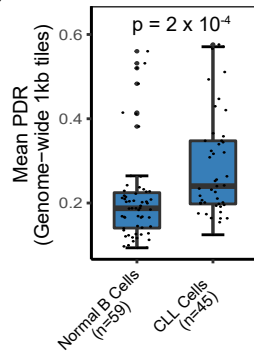**E**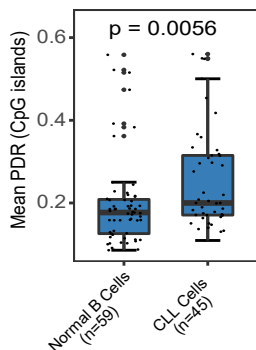**F**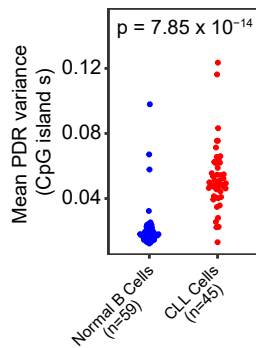**G**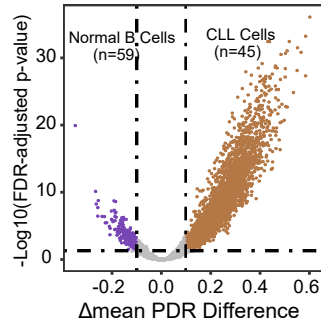**H**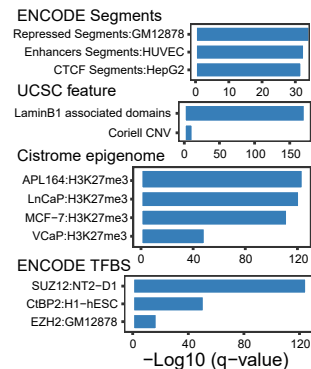**I**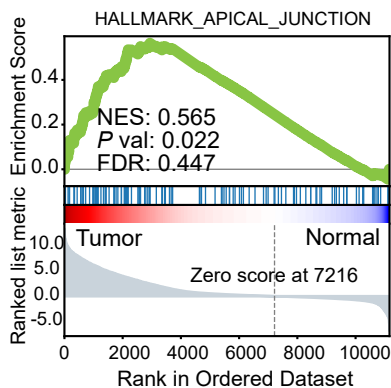**J**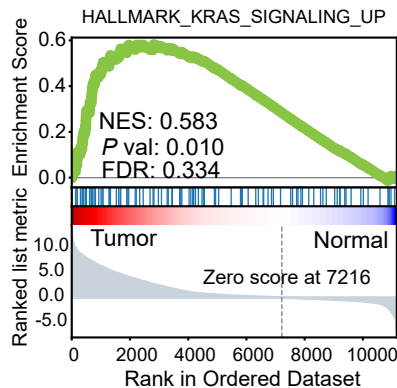**K**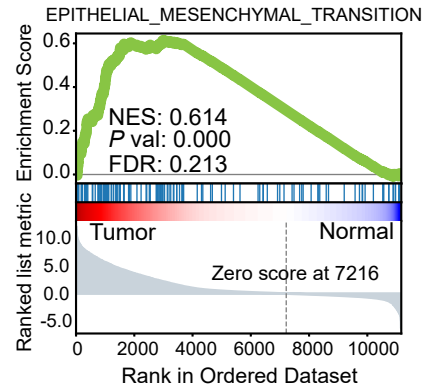

Supplement: btab458_supplementary_data.zip [file btab458_supplementary_data.zip › Fig. S9.pdf]
